# Supplementary material
Source: PubMed Central journal article supplement (PMC2808489)
Supplement: mmc4.pdf [file mmc4.pdf]

Biophysical Journal, Volume 98

**Supporting Material**

**Triplet Imaging of Oxygen Consumption During the Contraction of a Single Smooth Muscle Cell (A7r5)**

Matthias Geissbuehler, Thiemo Spielmann, Aurélie Formey, Iwan Märki, Marcel Leutenegger, Boris Hinz, Kai Johnsson, Dimitri Van De Ville, and Theo Lasser

## Triplet lifetime image of a smooth muscle cell A7r5 with high spatial resolution

Fluorescence intensity image

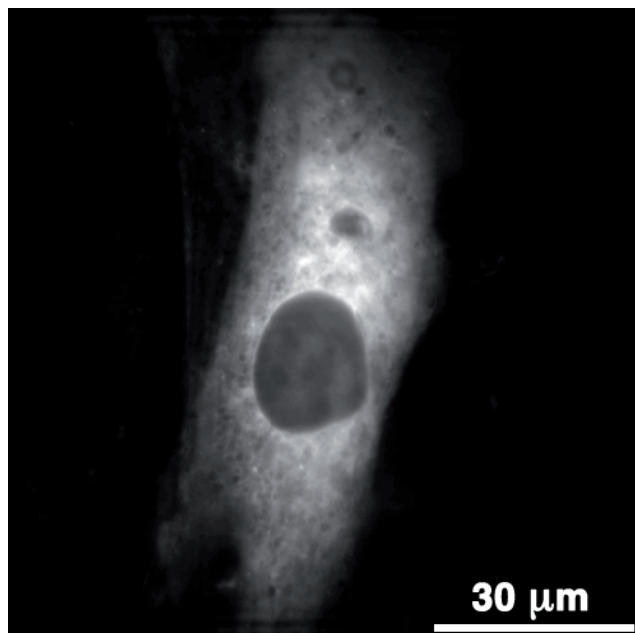

DIC image

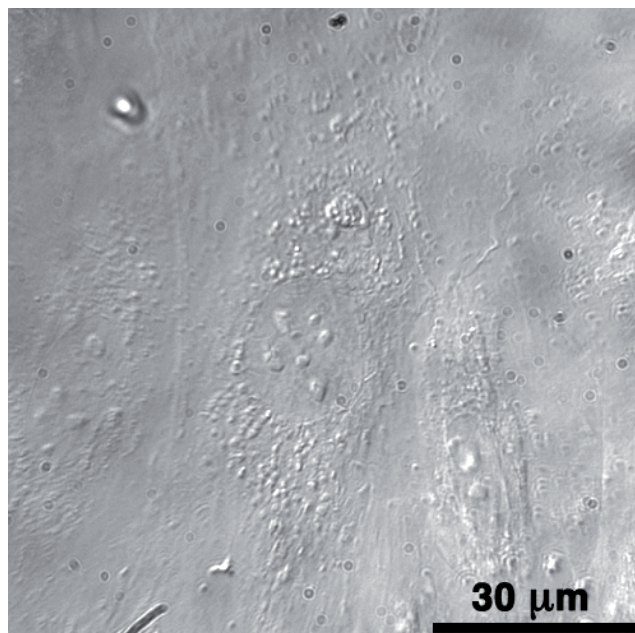

Triplet lifetime  $\tau_T$  [ $\mu$ s]

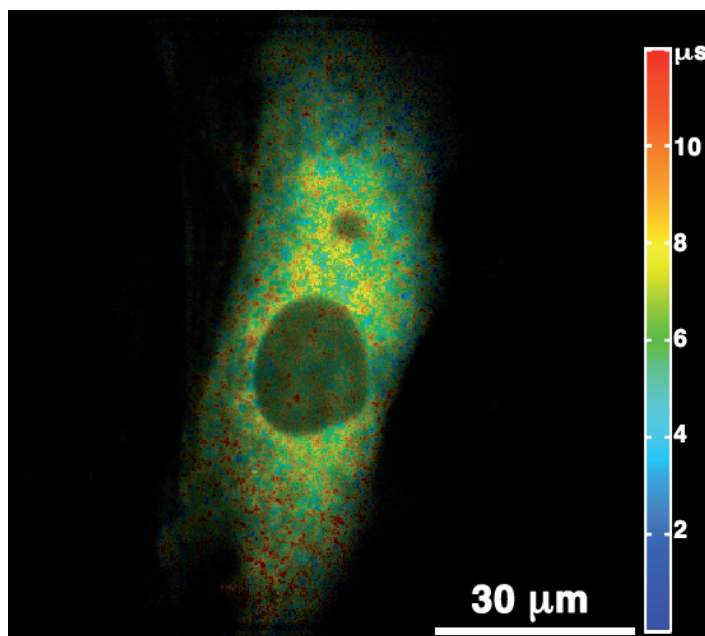

### Acquisition parameters

8 Modulated excitation images

4 Bleaching estimation images

Exposure 0.05 ms

Objective Olympus UPlanApo/IR - 60x/1.2W

Laser 9 W

$I_{\text{center}}$   $\sim 4$  mW/ $\mu$ m<sup>2</sup>

Labeling Standard Covalys Protocol
